# Supplementary material
Source: HighWire-hosted journal article supplement (http://www.qdcxjkg.com/highwire/filestream/113346/field_highwire_adjunct_files/0/online_supplement1.pdf)
Supplement: online_supplement1.pdf [file online_supplement1.pdf]

**Table E1 of the online supplement. Median sputum concentrations of IL-8, MPO, LTB4 and neutrophils and macrophages in individual patients with A1ATD and their matched usual COPD control**

| <b>Patient</b> | <b>Biomarker</b>   | <b>A1ATD</b>       | <b>COPD</b>        |
|----------------|--------------------|--------------------|--------------------|
| <b>1</b>       | <b>IL-8</b>        | 11.8 (9.7 - 13.8)  | 14.3 (11 - 15.4)   |
|                | <b>MPO</b>         | 1.7 (1.0 - 1.9)    | 7.2 (6.3 - 9.4)    |
|                | <b>LTB4</b>        | 14.5 (7.7 - 37.8)  | 91.2 (37.2 - 94.2) |
|                | <b>Neutrophils</b> | 3.3 (1.5 - 7.8)    | 4.45 (4.1 - 6.2)   |
|                | <b>Macrophages</b> | 0.4 (0.2 - 0.8)    | 0.12 (0.04 - 0.17) |
| <b>2</b>       | <b>IL-8</b>        | 20.6 (12.0 - 23.5) | 4.8 (3.8 - 6.0)    |
|                | <b>MPO</b>         | 0.4 (0.4 - 0.6)    | 1.8 (1.7 - 1.8)    |
|                | <b>LTB4</b>        | 20.6 (14.2 - 30.8) | 1.1 (0.8 - 1.6)    |
|                | <b>Neutrophils</b> | 1.0 (0.6 - 1.4)    | 6.1 (5 - 6.8)      |
|                | <b>Macrophages</b> | 0.62 (0.2 - 0.9)   | 0.18 (0.13 - 0.2)  |
| <b>3</b>       | <b>IL-8</b>        | 2.22 (1.6 - 3.8)   | 1.4 (1.2 - 1.4)    |
|                | <b>MPO</b>         | 1.58 (1.47 - 1.8)  | 1.7 (1.6 - 1.9)    |
|                | <b>LTB4</b>        | 2.04 (1.6 - 2.9)   | 5.9 (5.3 - 6.4)    |
|                | <b>Neutrophils</b> | 1.2 (0.8 - 2.3)    | 6.4 (5.2 - 7.8)    |
|                | <b>Macrophages</b> | 0.7 (0.27 - 1.39)  | 0.08 (0.06 - 0.11) |
| <b>4</b>       | <b>IL-8</b>        | 24.6 (20 - 34.6)   | 25.8 (22 - 27.3)   |
|                | <b>MPO</b>         | 4.2 (3.9 - 4.4)    | 3.1 (1.7 - 4.1)    |
|                | <b>LTB4</b>        | 33.8 (27.9 - 46.8) | 28.7 (20.8 - 40.4) |
|                | <b>Neutrophils</b> | 6.1 (4.9 - 9.8)    | 7.8 (5.9 - 17.6)   |
|                | <b>Macrophages</b> | 1.2 (0.5 - 1.3)    | 0.13 (0.12 - 0.44) |
| <b>5</b>       | <b>IL-8</b>        | 11.3 (7.5 - 17.7)  | 5.4 (4.9 - 6.9)    |
|                | <b>MPO</b>         | 3.3 (3.2 - 3.9)    | 4.1 (3.4 - 12.3)   |
|                | <b>LTB4</b>        | 65.3 (46.8 - 73.9) | 11.6 (2.2 - 17.6)  |
|                | <b>Neutrophils</b> | 5.3 (2.9 - 8.6)    | 6.23 (5.9 - 6.9)   |
|                | <b>Macrophages</b> | 0.87 (0.6 - 3.02)  | 0.4 (0.3 - 1.02)   |
| <b>6</b>       | <b>IL-8</b>        | 22.4 (20.5 - 32.6) | 6 (1.8 - 40.1)     |
|                | <b>MPO</b>         | 2.4 (2.3 - 2.6)    | 2.4 (1.6 - 4.2)    |
|                | <b>LTB4</b>        | 4.9 (2.9 - 7.8)    | 11.4 (8.3 - 49.0)  |
|                | <b>Neutrophils</b> | 5.8 (3.9 - 6.3)    | 5.15 (3.8 - 6.5)   |
|                | <b>Macrophages</b> | 1.9 (1.8 - 3.7)    | 0.28 (0.2 - 0.3)   |
| <b>7</b>       | <b>IL-8</b>        | 0.4 (0.2 - 0.5)    | 1.0 (0.5 - 2.6)    |
|                | <b>MPO</b>         | 0.2 (0.1 - 0.3)    | 1.9 (1.1 - 2.4)    |
|                | <b>LTB4</b>        | 3.2 (0.1 - 4.0)    | 0.5 (0.3 - 0.6)    |
|                | <b>Neutrophils</b> | 4.9 (2.2 - 7.8)    | 7.3 (6.3 - 11.9)   |
|                | <b>Macrophages</b> | 1.1 (0.3 - 1.6)    | 0.37 (0.3 - 0.7)   |

### **Legend**

Presented data are the median concentrations (with interquartile range in parentheses) of the nine visits for a single patient. Individual A1ATD patients were matched with patients with usual COPD by the presence of chronic bronchitis, FEV<sub>1</sub>, gas transfer, pack year smoking history and smoking status, medications and gender.

**Table E1 of the online supplement (continued). Median sputum concentrations of IL-8, MPO, LTB4 and neutrophils and macrophages in individual patients with A1ATD and their matched usual COPD control**

| <b>Patient</b> | <b>Biomarker</b>   | <b>A1ATD</b> |                | <b>COPD</b> |               |
|----------------|--------------------|--------------|----------------|-------------|---------------|
| <b>8</b>       | <b>IL-8</b>        | 1.6          | (1.0 - 2.1)    | 8.3         | (0.2 - 0.4)   |
|                | <b>MPO</b>         | 0.3          | (0.2 - 0.4)    | 7.1         | (1.0 - 1.3)   |
|                | <b>LTB4</b>        | 1.8          | (1.7 - 2.1)    | 10          | (7.0 - 14.0)  |
|                | <b>Neutrophils</b> | 0.4          | (0.3 - 0.6)    | 13.6        | (12.5 - 16.2) |
|                | <b>Macrophages</b> | 0.34         | (0.03 - 0.46)  | 0.8         | (0.08 - 0.3)  |
| <b>9</b>       | <b>IL-8</b>        | 10.6         | (6.2 - 12.5)   | 3.4         | (2.8 - 4.2)   |
|                | <b>MPO</b>         | 0.7          | (0.6 - 0.7)    | 0.9         | (0.7 - 1.0)   |
|                | <b>LTB4</b>        | 24.8         | (13.5 - 45.1)  | 2.8         | (2.2 - 3.7)   |
|                | <b>Neutrophils</b> | 0.5          | (0.3 - 4.6)    | 5.6         | (4.9 - 6.6)   |
|                | <b>Macrophages</b> | 0.4          | (0.21 - 0.99)  | 0.31        | (0.2 - 0.5)   |
| <b>10</b>      | <b>IL-8</b>        | 12.0         | (7.3 - 15.7)   | 2.1         | (1.1 - 2.8)   |
|                | <b>MPO</b>         | 0.5          | (0.46 - 0.51)  | 1.9         | (1.3 - 2.0)   |
|                | <b>LTB4</b>        | 10.3         | (6.5 - 12.6)   | 8.0         | (3.3 - 11.4)  |
|                | <b>Neutrophils</b> | 1.5          | (0.7 - 2.3)    | 4.1         | (3.6 - 4.9)   |
|                | <b>Macrophages</b> | 0.28         | (0.15 - 0.31)  | 1.7         | (1.3 - 2.1)   |
| <b>11</b>      | <b>IL-8</b>        | 32.6         | (25.2 - 39.4)  | 1.8         | (1.5 - 2.6)   |
|                | <b>MPO</b>         | 1.8          | (0.7 - 0.9)    | 0.8         | (0.3 - 0.9)   |
|                | <b>LTB4</b>        | 75.9         | (26.6 - 107.8) | 1.4         | (0.4 - 1.9)   |
|                | <b>Neutrophils</b> | 2.8          | (1.8 - 4.5)    | 4.5         | (4.3 - 5.2)   |
|                | <b>Macrophages</b> | 1.39         | (0.6 - 2.1)    | 0.42        | (0.09 - 0.9)  |
| <b>12</b>      | <b>IL-8</b>        | 1.4          | (0.7 - 1.71)   | 22.2        | (19.1 - 36.7) |
|                | <b>MPO</b>         | 0.5          | (0.4 - 0.6)    | 4.3         | (2.1 - 6.1)   |
|                | <b>LTB4</b>        | 11.5         | (7.3 - 14.0)   | 10.5        | (7.8 - 21.9)  |
|                | <b>Neutrophils</b> | 1.6          | (0.9 - 3.4)    | 13.7        | (8.2 - 12.7)  |
|                | <b>Macrophages</b> | 0.3          | (0.1 - 0.7)    | 2.57        | (1.8 - 5.3)   |

### **Legend**

Presented data are the median concentrations (with inter-quartile range in parentheses) of the nine visits for a single patient. Individual A1ATD patients were matched with patients with usual COPD by the presence of chronic bronchitis, FEV<sub>1</sub>, gas transfer, pack year smoking history and smoking status, medications and gender.

**Table E2 Intra-patient variability of sputum inflammatory mediators and cell counts in matched stable patients with usual COPD and A1ATD: the effect of a rolling mean.**

| Days     | IL8      |          | MPO     |          | LTB4     |          | Neutrophil |         | Macrophage |        |
|----------|----------|----------|---------|----------|----------|----------|------------|---------|------------|--------|
|          | A1ATD    | COPD     | A1ATD   | COPD     | A1ATD    | COPD     | A1ATD      | COPD    | A1ATD      | COPD   |
| <b>1</b> | 28.9     | 45.1     | 36.0    | 72.2     | 32.0     | 45.5     | 69.4       | 23.0    | 111.2      | 71.4   |
| <b>3</b> | 17.2 **  | 32.2 **  | 13.5**  | 34.1**   | 14.5 **  | 30.7*    | 47.1**     | 11.7*   | 47.3**     | 26.0 * |
| <b>5</b> | 10.9** ^ | 13.8**^^ | 6.3**^^ | 20.2**^^ | 6.9 **^^ | 18.5**^^ | 20.1** ^   | 7.9** ^ | 24.7** ^   | 16.8 * |

**Legend**

Data is the intra-patient variability, expressed as the median co-efficient of variance (CV) as a percentage. The median coefficient of variation has been derived from the mediator specific CV from each patient. Differences in CVs were assessed using the Wilcoxon's matched pairs signed rank test. \* = significant reduction in mean CV from raw data ( $p < 0.05$ ), \*\* ( $p < 0.01$ ) ^ = significant reduction in mean CV from 3 day rolling mean ( $p < 0.05$ ), ^^ ( $p < 0.01$ )

**Table E3. A comparison of the numbers needed in a parallel study design when one day's data, the mean of three days' data or the mean of five days' data are used for calculations in A1ATD and usual COPD**

| Days     | IL8   |      | MPO   |      | LTB4  |      | Neutrophil |      | Macrophage |      |
|----------|-------|------|-------|------|-------|------|------------|------|------------|------|
|          | A1ATD | COPD | A1ATD | COPD | A1ATD | COPD | A1ATD      | COPD | A1ATD      | COPD |
| <b>1</b> | 59    | 106  | 537   | 143  | 30    | 89   | 172        | 32   | 186        | 56   |
| <b>3</b> | 8     | 17   | 71    | 37   | 9     | 10   | 110        | 8    | 129        | 27   |
| <b>5</b> | 7     | 12   | 50    | 17   | 9     | 13   | 79         | 6    | 96         | 18   |

**Legend**

Numbers required to provide an 80% chance of detecting a 50% decrease in mediators or cells at the 5% level of significance. For 1 day's data, power calculations were performed for each mediator or cell using data from the first study visit. For three and five days' data; power calculations were performed using data collected on the first three days (visit 1 to 3) or first five days respectively.
